# Supplementary material for: Investigation of the preparation, characterization, and whitening activity of co-amorphous glabridin and oxymatrine
Source: Royal Society of Chemistry journal article supplement (doi:10.1039/d3ce00807j), 2023-01-01
Supplement: d3ce00807j1.pdf [file d3ce00807j1.pdf]

## Supplementary information

### Investigation of the preparation, characterization, and whitening activity of glabridin and oxymatrine co-amorphous

Peiyi Liang<sup>#a</sup>, Yi Hu<sup>#a</sup>, Zhuxian Wang<sup>a</sup>, Yinglin Guo<sup>a</sup>, Hongkai Chen<sup>a</sup>, CuiPing Jiang<sup>a</sup>, Quanfu Zeng<sup>a</sup>, Chunyan Shen<sup>a</sup>, Yufan Wu<sup>a</sup>, Li Liu<sup>a</sup>, Yankui Yi<sup>a</sup>, Hongxia Zhu<sup>\*b</sup>, Zhijun Yang<sup>\*c</sup>, Qiang Liu<sup>\*a</sup>

<sup>a</sup> School of Traditional Chinese Medicine, Southern Medical University, Guangzhou 510515, PR China

<sup>b</sup> Integrated Hospital of Traditional Chinese Medicine, Southern Medical University, Guangzhou 510315, PR China

<sup>c</sup> School of Chinese Medicine, Hong Kong Baptist University, Hong Kong 999077, PR China

<sup>#</sup>Peiyi Liang and Yi Hu contributed equally to this work.

**\*Corresponding author:** School of Traditional Chinese Medicine, Southern Medical University, Guangzhou, 510515, China. Tel.: +86-20-6164-8264, (Qiang Liu) *Email-address:* liuqiang@smu.edu.cn

**\*Corresponding author:** School of Chinese Medicine, Hong Kong Baptist University, Hong Kong 999077, China. Tel.: +852-3411-2961, (Zhijun Yang) *Email-address:* yzhijun@hkbu.edu.hk

**\*Corresponding author:** Integrated Hospital of Traditional Chinese Medicine, Southern Medical University, Guangzhou, 510315, China. Tel.: +86-20-6278-9408, (Hongxia Zhu) *Email-address:* gzzhx2012@163.com

**Table S1** The pH change of Gla, physical mixture of Gla-OMT and co-amorphous Gla-OMT before and after dissolution.

| buffer solution | Simples                     | Initial pH | pH after dissolution |
|-----------------|-----------------------------|------------|----------------------|
|                 | Gla                         |            | 1.03                 |
| 1.0             | Physical mixture of Gla-OMT | 1.01       | 1.02                 |
|                 | Co-amorphous Gla-OMT        |            | 1.04                 |
|                 | Gla                         |            | 4.03                 |
| 4.0             | Physical mixture of Gla-OMT | 4.02       | 4.07                 |
|                 | Co-amorphous Gla-OMT        |            | 4.09                 |
|                 | Gla                         |            | 6.83                 |
| 6.8             | Physical mixture of Gla-OMT | 6.82       | 6.87                 |
|                 | Co-amorphous Gla-OMT        |            | 6.86                 |
|                 | Gla                         |            | 5.84                 |
| Water           | Physical mixture of Gla-OMT | 5.34       | 6.87                 |
|                 | Co-amorphous Gla-OMT        |            | 6.88                 |

**Table S2** Molecular docking scores of tyrosinase with Gly and OMT.

| Compound | Protein (RCSB Protein Data Bank) | Libdock score |
|----------|----------------------------------|---------------|
| Gla      | Tyrosinase (PDB:6EI4)            | 124.00        |
| OMT      | Tyrosinase (PDB:6EI4)            | 100.37        |

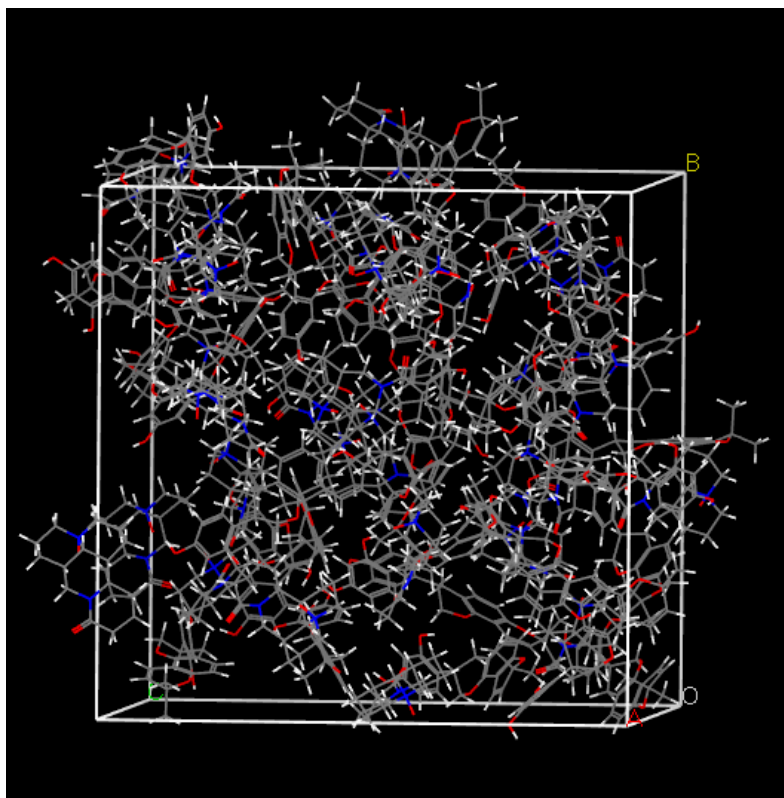

**Figure S1** AC model of co-amorphous Gla-OMT.

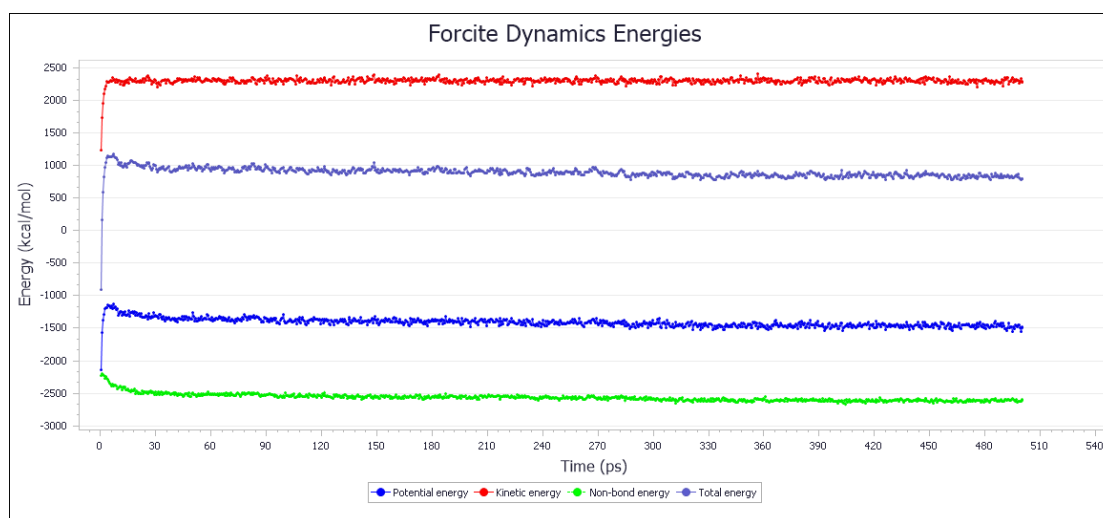

**Figure S2** Density as a function of time during the optimization of NPT kinetics for the Gla-OMT coamorphous model.

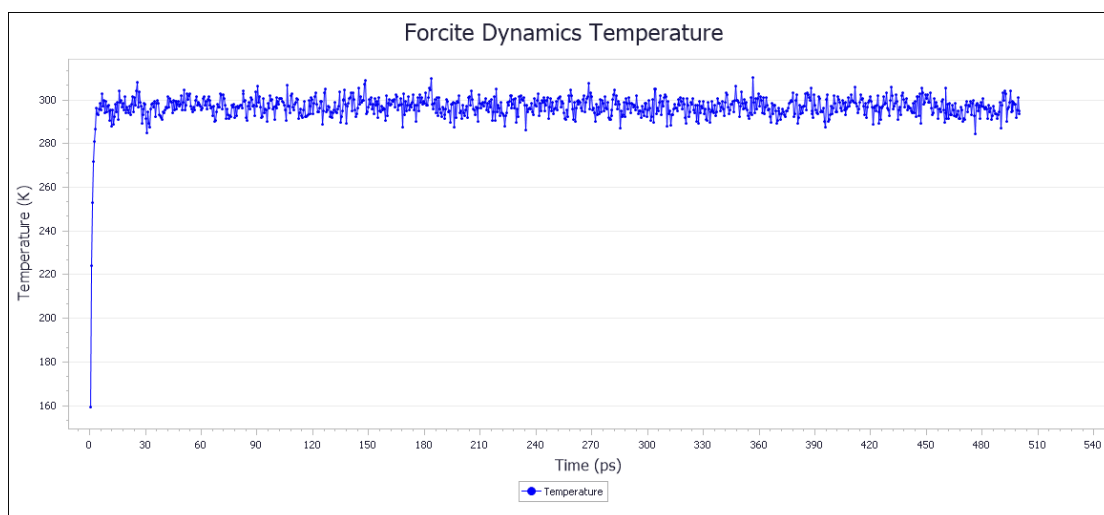

**Figure S3** Energy as a function of time during the optimization of NPT kinetics for the Gla-OMT coamorphous model.

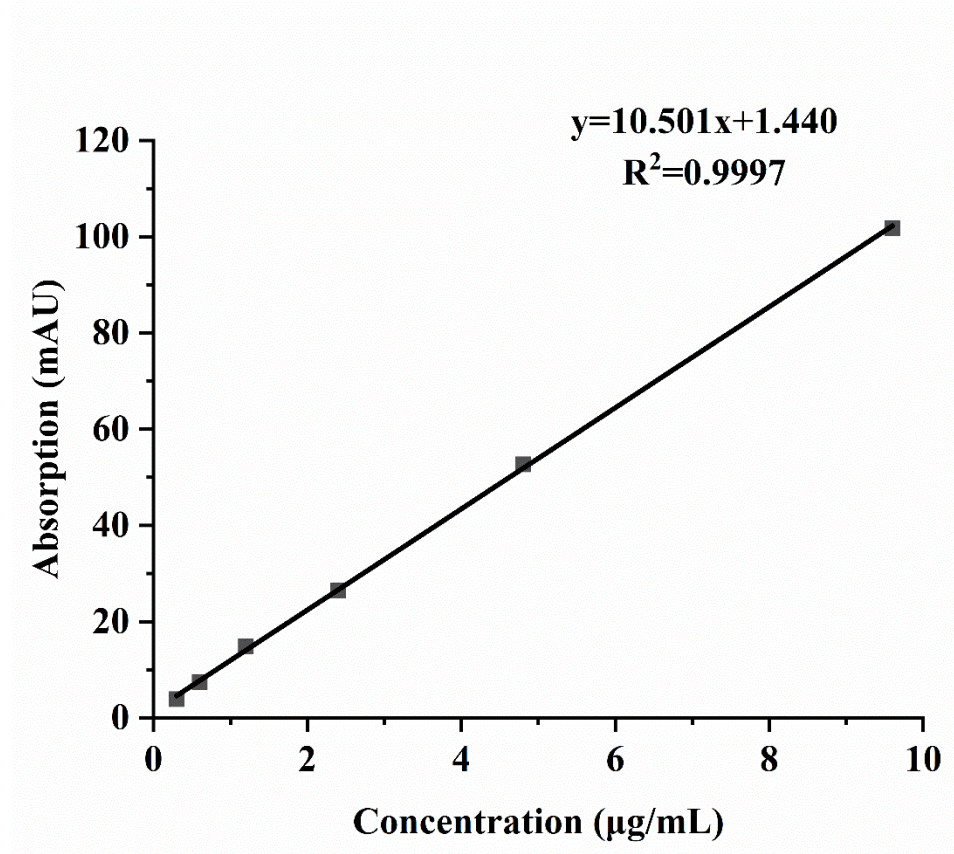

**Figure S4** Glabridin standard curve.

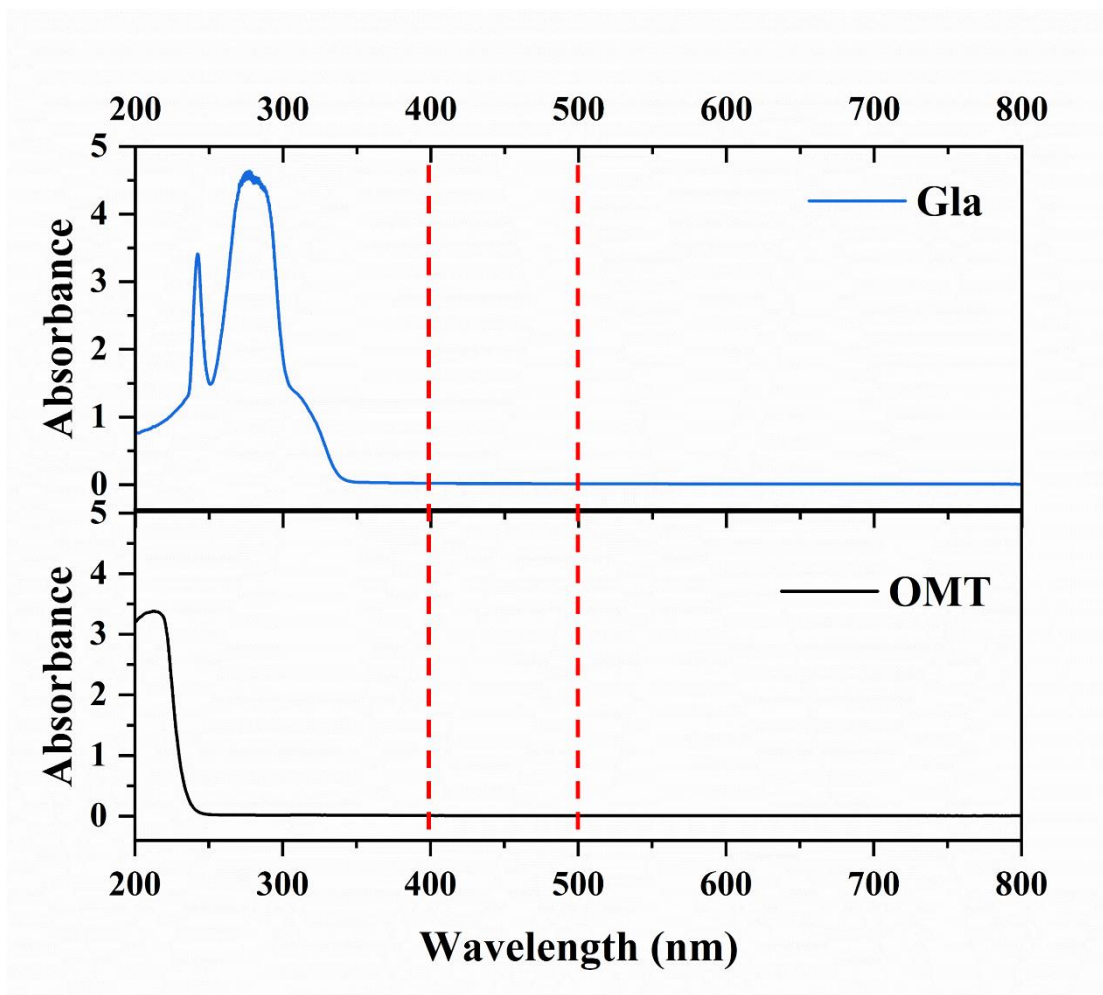

**Figure S5** The UV-Vis absorption spectra of Gla and OMT in the range of 200-800 nm.

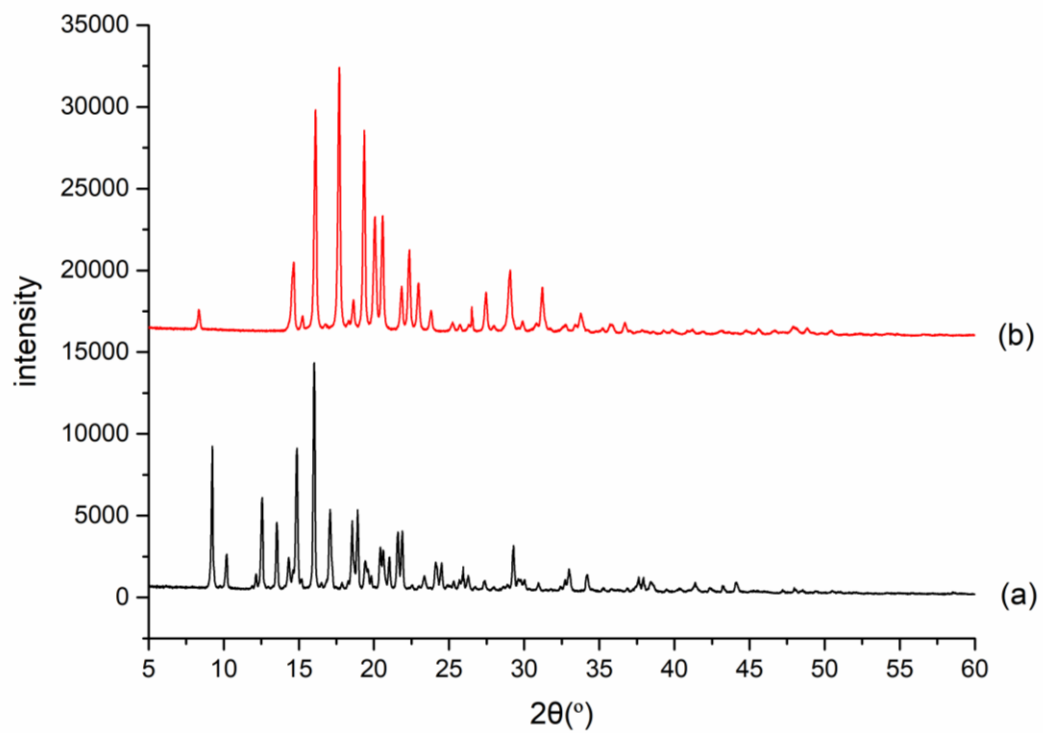

**Figure S6** PXRD patterns of OMT evaporation products (a) and Gla evaporation products (b).

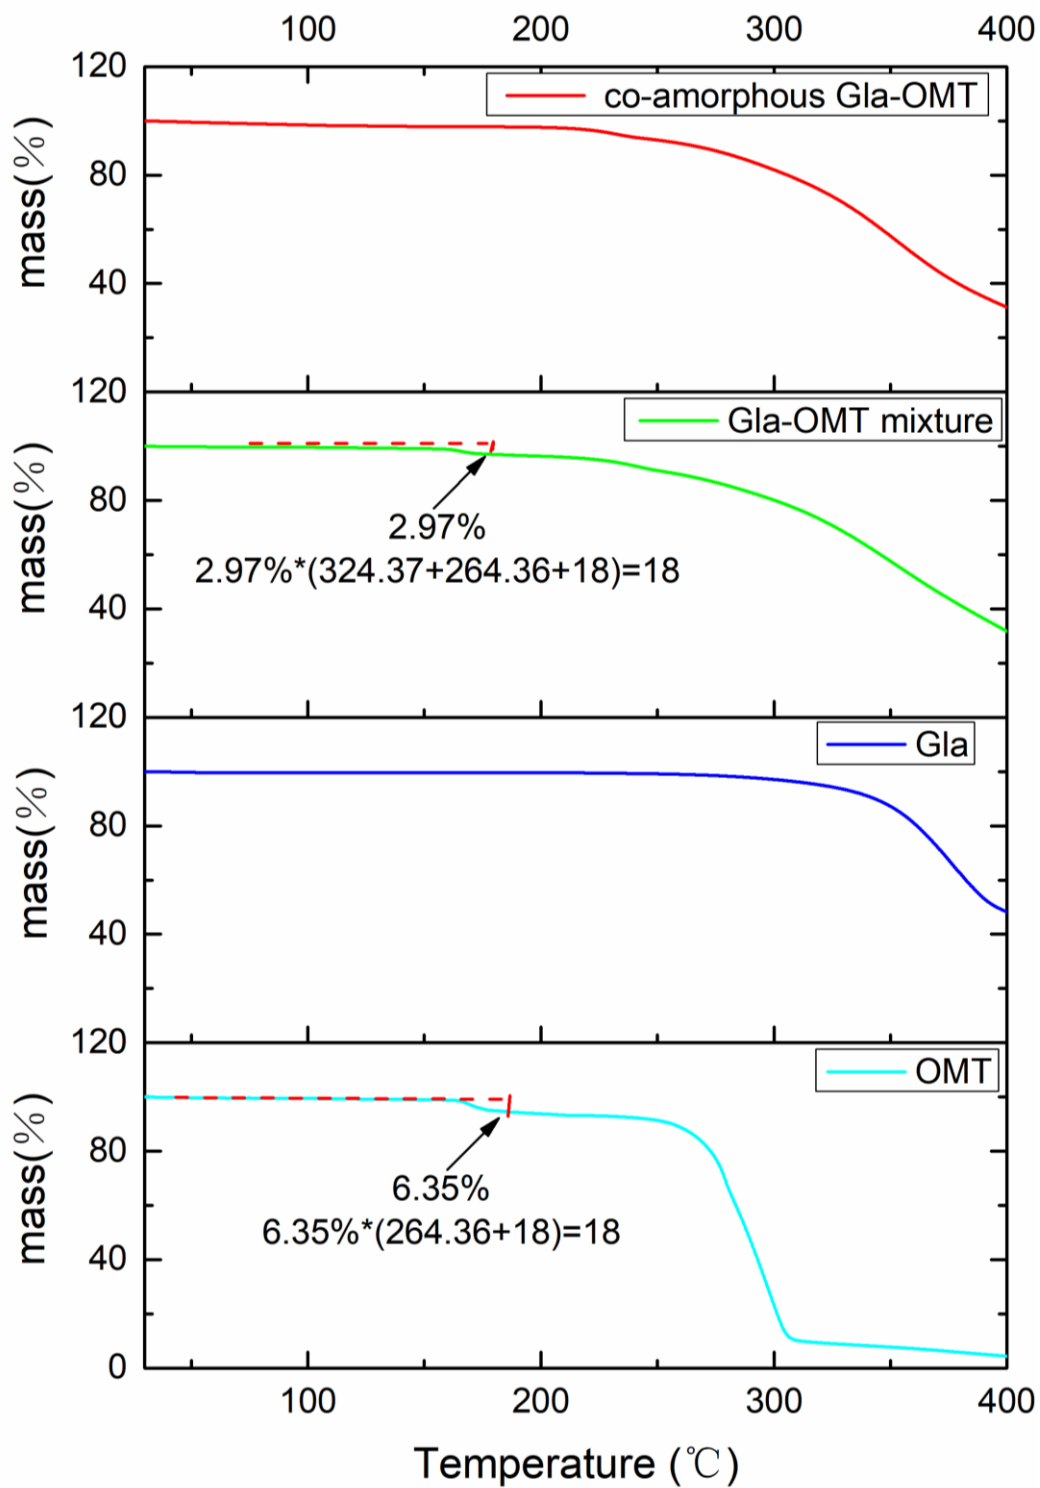

**Figure S7** The TG thermograms of OMT, Gla, physical mixture of Gla-OMT, and co-amorphous Gla- OMT.

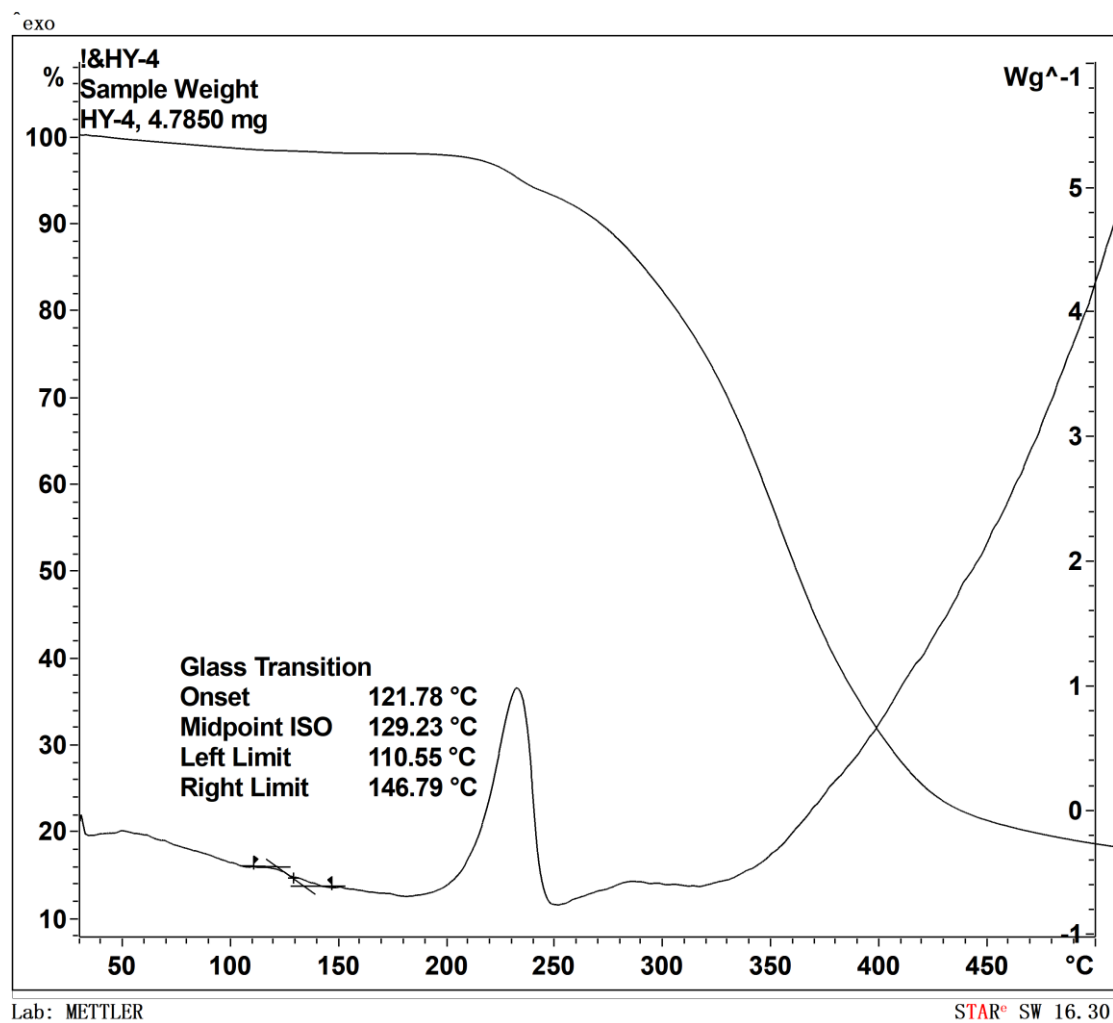

**Figure S8** The TG-DSC thermograms of co-amorphous Gla- OMT.

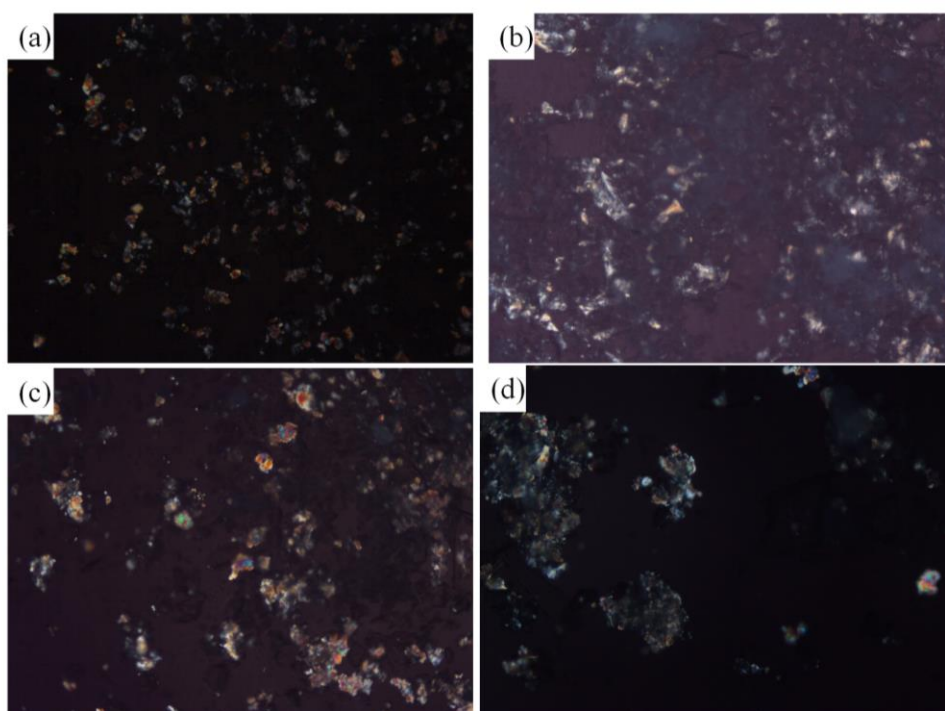



**Figure S9** Polarized light microscope patterns of co-amorphous Gla-OMT after dissolving for 24h at pH 1.0 (a), 4.0 (b), 6.8 (c), and water (d).

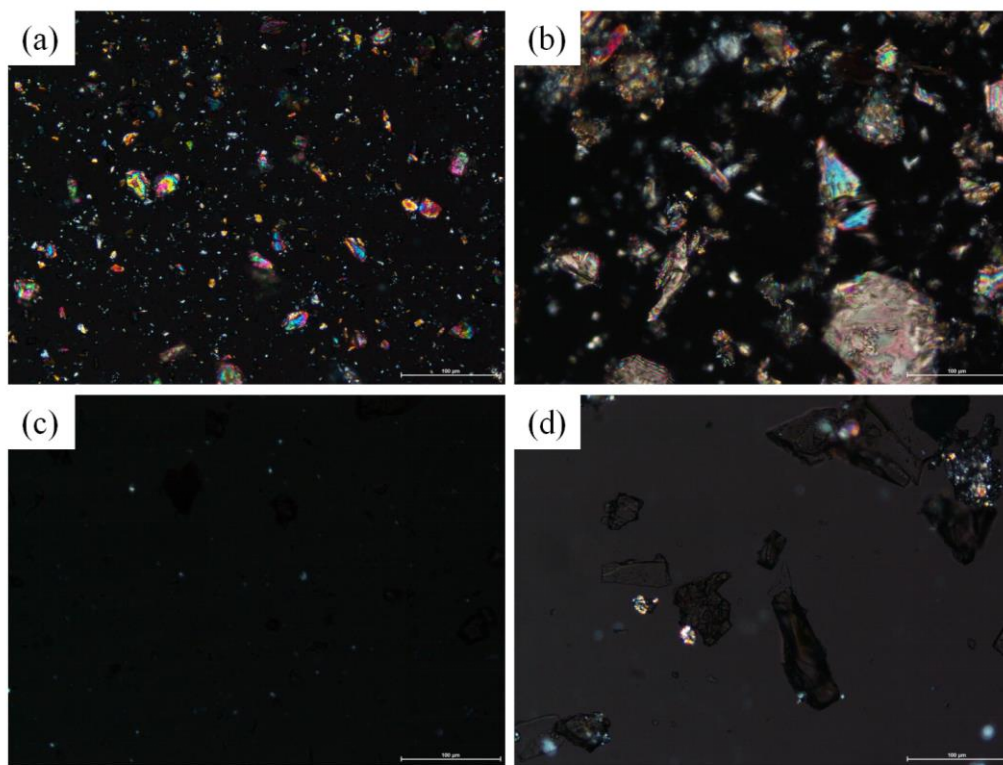

**Figure S10** The polarizing microscope patterns of crystalline Gla (a), crystalline OMT (b), and co-amorphous Gla-OMT (c), as well as the polarizing microscope pattern of co-amorphous Gla-OMT after 24 hours of dissolution (d).

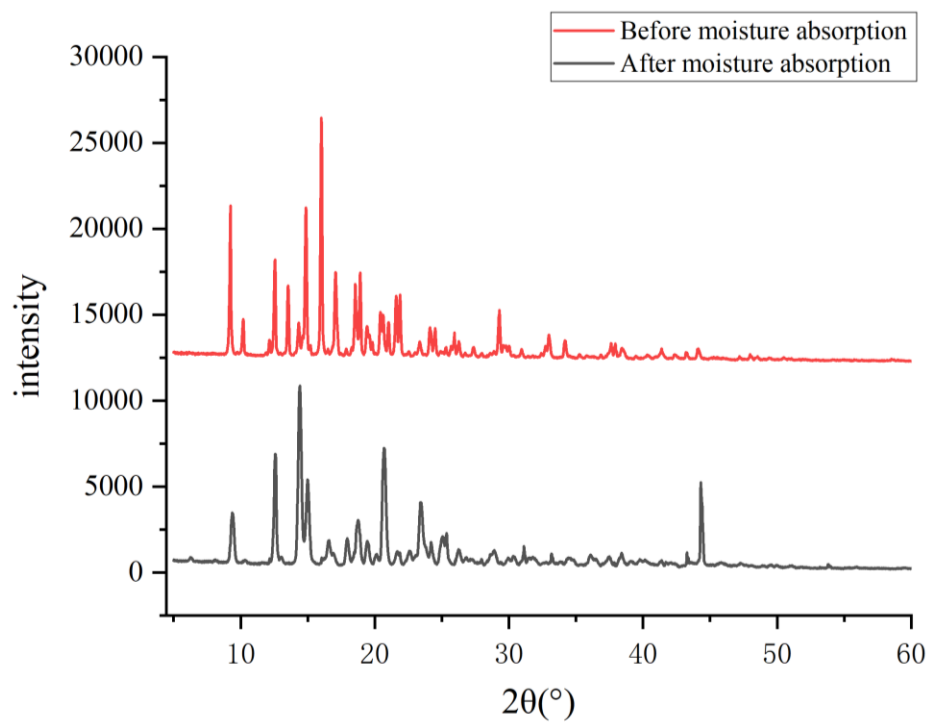

**Figure S11** PXRd pattern of crystalline OMT before and after moisture absorption.

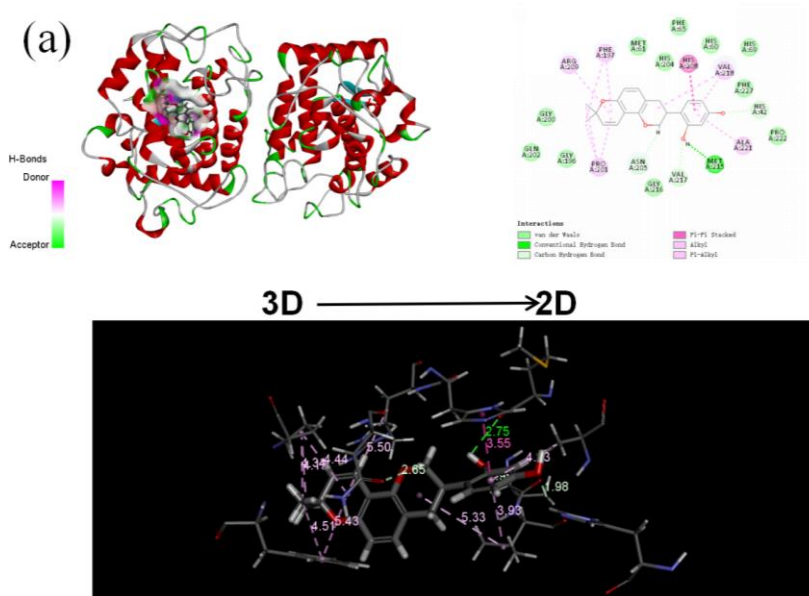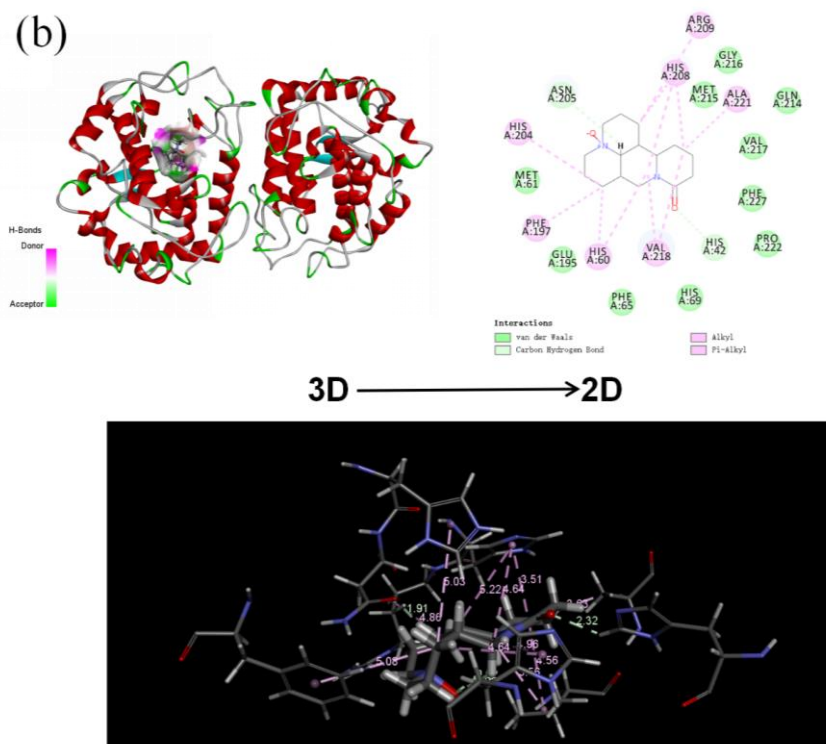

**Figure S12** Molecular docking of tyrosinase (PDB: PDB:6EI4) with Gla (a) and OMT (b).

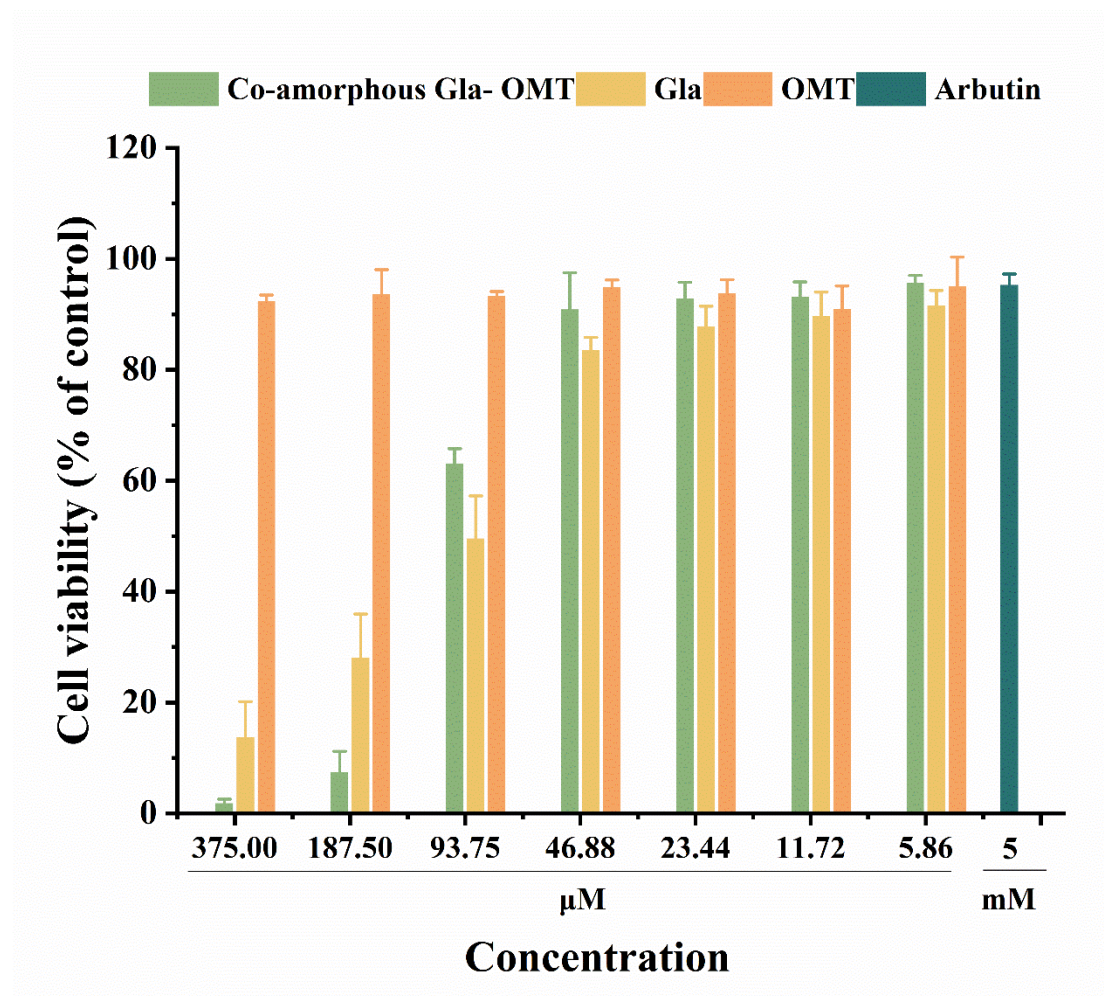

**Figure S13** Effects of different drugs on cell activity

### 1 Polarizing Microscope

A small amount of crystalline Gla, crystalline OMT, and co-amorphous Gla-OMT samples are respectively placed on glass slides. A small amount of liquid paraffin is added to disperse them thoroughly. Morphological observations were performed using a 10×10 magnification LV100N POL polarizing microscope (Nikon, Japan). The images were collected using NIS-Elements F 4.00.00 software (Nikon, Japan).

### 2 Polarizing Microscope Analysis

The polarizing microscope results for crystalline Gla, crystalline OMT, and co-amorphous Gla-OMT samples are shown in **Figure S10**. Under the polarizing microscope, both crystalline Gla and crystalline OMT exhibit evident birefringence phenomena. The co-amorphous Gla-OMT form appears as irregular fragments under the polarizing microscope, lacking the birefringence phenomenon. This indicates that

co-amorphous Gla-OMT no longer possesses a crystalline structure and is in an amorphous state.
